# Supplementary material for: Interaktionsbezogene Selbstwirksamkeitserwartungen frühpädagogischer Fachkräfte
Source: Atypon-hosted journal article supplement (doi:10.1026/2191-9186/a000617), 2023-06-28
Supplement: 2191-9186_a000617_esm1.pdf [file 2191-9186_a000617_esm1.pdf]

# Elektronische Supplemente (ESM 1)

**Tabelle E1.** Deskriptive Statistiken, Trennschärfe und Itemschwierigkeit der Items

| Item                                    | <i>M</i> | <i>SD</i> | <i>Min</i> | <i>Max</i> | <i>TR</i> | <i>IS</i> |
|-----------------------------------------|----------|-----------|------------|------------|-----------|-----------|
| Ich traue mir zu ...                    |          |           |            |            |           |           |
| Emotionale Unterstützung (4 Items)      |          |           |            |            |           |           |
| 05                                      | 8.25     | 1.11      | 2          | 9          | 0.80      | 0.74      |
| 06                                      | 8.25     | 1.07      | 2          | 9          | 0.85      | 0.74      |
| 09                                      | 8.46     | 1.04      | 1          | 9          | 0.74      | 0.78      |
| 11                                      | 7.83     | 1.25      | 1          | 9          | 0.77      | 0.71      |
| Organisation des Kita-Alltags (4 Items) |          |           |            |            |           |           |
| 01                                      | 7.74     | 1.26      | 1          | 9          | 0.59      | 0.70      |
| 02                                      | 7.91     | 1.24      | 1          | 9          | 0.77      | 0.72      |
| 08                                      | 8.20     | 1.20      | 1          | 9          | 0.70      | 0.75      |
| 12                                      | 7.97     | 1.20      | 1          | 9          | 0.56      | 0.71      |
| Lernunterstützung (4 Items)             |          |           |            |            |           |           |
| 03                                      | 7.72     | 1.55      | 1          | 9          | 0.66      | 0.70      |
| 04                                      | 7.81     | 1.26      | 3          | 9          | 0.62      | 0.67      |
| 07                                      | 7.97     | 1.34      | 2          | 9          | 0.53      | 0.71      |
| 10                                      | 7.73     | 1.21      | 4          | 9          | 0.50      | 0.62      |

Anmerkungen: *M* = Mittelwert, *SD* = Standardabweichung, *Min* = Minimum, *Max* = Maximum, *TR* = Trennschärfe, *IS* = Itemschwierigkeit.
