# Supplementary material for: Interaktionsbezogene Selbstwirksamkeitserwartungen frühpädagogischer Fachkräfte
Source: Atypon-hosted journal article supplement (doi:10.1026/2191-9186/a000617), 2023-06-28
Supplement: 2191-9186_a000617_esm2.pdf [file 2191-9186_a000617_esm2.pdf]

## Elektronische Supplemente (ESM 2)

**Tabelle E2.** Standardisierte Faktorladungen  $\lambda$  und nicht-erklärte Varianz  $\delta$  der konfirmatorischen Faktorenanalysen (3-CFA, B-CFA) und explorativen Strukturgleichungsmodelle (3-ESEM, B-ESEM).

| Indikator                     | 3-CFA       |          | 3-ESEM                   |              |                         |          | B-CFA       |                         |          | B-ESEM                  |               |                         |               |          |
|-------------------------------|-------------|----------|--------------------------|--------------|-------------------------|----------|-------------|-------------------------|----------|-------------------------|---------------|-------------------------|---------------|----------|
|                               | S $\lambda$ | $\delta$ | E $\lambda$              | O $\lambda$  | L $\lambda$             | $\delta$ | G $\lambda$ | S $\lambda$             | $\delta$ | G- $\lambda$            | S-E $\lambda$ | S-O $\lambda$           | S-L $\lambda$ | $\delta$ |
| Emotionale Unterstützung      |             |          |                          |              |                         |          |             |                         |          |                         |               |                         |               |          |
| 05                            | <b>0.87</b> | 0.82     | <b>0.90</b>              | <i>-0.08</i> | <i>0.09</i>             | 0.21     | <b>0.77</b> | <b>0.37</b>             | 0.00     | <b>0.67</b>             | <b>0.63</b>   | <i>-0.09</i>            | <i>0.11</i>   | 0.16     |
| 06                            | <b>0.90</b> | 0.76     | <b>0.91</b>              | <i>0.03</i>  | <i>-0.03</i>            | 0.17     | <b>0.75</b> | <b>0.66</b>             | 0.39     | <b>0.65</b>             | <b>0.64</b>   | <i>0.02</i>             | <i>0.02</i>   | 0.37     |
| 09                            | <b>0.79</b> | 0.62     | <b>0.59</b>              | <i>0.21</i>  | <i>0.04</i>             | 0.39     | <b>0.74</b> | <b>0.23</b>             | 0.28     | <i>0.64<sup>#</sup></i> | <i>0.38</i>   | <i>0.15</i>             | <i>-0.11</i>  | 0.29     |
| 11                            | <b>0.82</b> | 0.68     | <b>0.63</b>              | <i>0.12</i>  | <i>0.17</i>             | 0.31     | <b>0.84</b> | 0.14                    | 0.27     | <b>0.75</b>             | <i>0.36</i>   | <i>0.02</i>             | <i>-0.06</i>  | 0.19     |
| Organisation des Kita-Alltags |             |          |                          |              |                         |          |             |                         |          |                         |               |                         |               |          |
| 01                            | <b>0.68</b> | 0.46     | <i>-0.02</i>             | <b>0.64</b>  | <i>0.10</i>             | 0.10     | <b>0.60</b> | <i>0.28<sup>#</sup></i> | 0.00     | <b>0.58</b>             | <i>-0.04</i>  | <i>0.36<sup>#</sup></i> | <i>0.11</i>   | 0.36     |
| 02                            | <b>0.85</b> | 0.71     | <i>-0.08</i>             | <b>0.88</b>  | <i>0.08</i>             | 0.47     | <b>0.71</b> | <b>0.69</b>             | 0.50     | <b>0.69</b>             | <i>-0.07</i>  | <b>0.55</b>             | <i>0.07</i>   | 0.26     |
| 08                            | <b>0.79</b> | 0.63     | <i>0.06</i>              | <b>0.77</b>  | <i>-0.01</i>            | 0.57     | <b>0.71</b> | <b>0.31</b>             | 0.59     | <b>0.65</b>             | <i>0.00</i>   | <b>0.50</b>             | <i>-0.08</i>  | 0.59     |
| 12                            | <b>0.69</b> | 0.47     | <b>0.50</b>              | <i>0.23</i>  | <i>0.06</i>             | 0.61     | <b>0.76</b> | <i>-0.01</i>            | 0.56     | <b>0.62</b>             | <i>0.31</i>   | <i>0.12</i>             | <i>-0.05</i>  | 0.35     |
| Lernunterstützung             |             |          |                          |              |                         |          |             |                         |          |                         |               |                         |               |          |
| 03                            | <b>0.70</b> | 0.48     | <i>-0.15<sup>#</sup></i> | <i>-0.18</i> | <b>1.12</b>             | 0.52     | <b>0.52</b> | <b>0.86</b>             | 0.56     | <b>0.75</b>             | <b>-0.19</b>  | <i>-0.13</i>            | <i>0.11</i>   | 0.52     |
| 04                            | <b>0.77</b> | 0.59     | <i>0.09</i>              | <i>0.25</i>  | <i>0.47<sup>#</sup></i> | 0.23     | <b>0.65</b> | <b>0.29</b>             | 0.02     | <i>0.72</i>             | <i>0.03</i>   | <i>0.02</i>             | <i>0.46</i>   | 0.23     |
| 07                            | <b>0.63</b> | 0.40     | <i>0.19</i>              | <i>0.04</i>  | <b>0.50</b>             | 0.35     | <b>0.60</b> | <b>0.29</b>             | 0.40     | <i>0.74<sup>#</sup></i> | <i>-0.05</i>  | <i>-0.06</i>            | <i>-0.30</i>  | 0.33     |
| 10                            | <b>0.67</b> | 0.45     | <i>0.14</i>              | <i>0.29</i>  | <i>0.27</i>             | 0.48     | <b>0.63</b> | <i>0.12</i>             | 0.42     | <b>0.60</b>             | <i>0.06</i>   | <i>0.10</i>             | <i>0.18</i>   | 0.48     |

Anmerkung: E = Emotionale Unterstützung, O = Organisation des Kita-Alltags, L = Lernunterstützung, Hauptladungen sind fett gedruckt, <sup>#</sup> marginal signifikante Ladungen ( $p < .10$ ) und nicht-signifikante Ladungen ( $p \geq .05$ ) sind kursiv dargestellt.
